# Supplementary material
Source: publisher figshare collection journal article supplement (https://acs.figshare.com/ndownloader/files/17510189)
Supplement: Supplementary file 1 [file 17510189]

**Supporting Information for:**

**Regulating phase separation behavior of DEEA-TETA biphasic solvent using sulfolane for energy-saving CO<sub>2</sub> capture**

Lidong Wang<sup>1,2</sup>, Shanshan Liu<sup>1,2</sup>, Rujie Wang<sup>1,2\*</sup>, Qiangwei Li<sup>1,2</sup>, Shihan Zhang<sup>3</sup>

*1 Hebei Key Lab of Power Plant Flue Gas Multi-Pollutants Control, Department of Environmental Science and Engineering, North China Electric Power University, Baoding, 071003, PR China*

*2 MOE Key Laboratory of Resources and Environmental Systems Optimization, College of Environmental Science and Engineering, North China Electric Power University, Beijing, 102206, PR China*

*3 College of Environment, Zhejiang University of Technology, Hangzhou, 310014*

**Summary: this file includes 10 Pages, 4 Figures, 2 Tables and 31 Equations**

---

\*Corresponding author. Tel.: +86 312 7525528.

E-mail address: [rujiawang@gmail.com](mailto:rujiawang@gmail.com) (R.J.W.)

## Supporting Information

Apparatus and methodology for the mass transfer study, apparatus for measuring the latent heat of CO<sub>2</sub> desorption, <sup>1</sup>H NMR spectra and the calculation of concentration ratio  $C_{\text{sulfolane}}/C_{\text{DEEA}}$ , species distribution in upper and lower phases, kinetics of CO<sub>2</sub> absorption using the TETA-DEEA-sulfolane absorbent, and the possible reactions during CO<sub>2</sub> absorption.

**Figure S1.** The wet-wall column experimental apparatus

**Figure S2.** The detailed parameters of the wet-wall column

**Figure S3.** Apparatus for measuring the latent heat of CO<sub>2</sub> absorption

**Figure S4.** <sup>1</sup>H NMR spectra of DEEA-TETA-sulfolane: fresh, upper phase (CO<sub>2</sub> loading=0.516mol/L), lower phase (CO<sub>2</sub> loading=4.631mol/L)

**Table S1.** Quantitative species distribution in upper and lower phases

**Table S2.** Kinetics of CO<sub>2</sub> absorption using TETA-DEEA-sulfolane absorbent in a wet-wall column

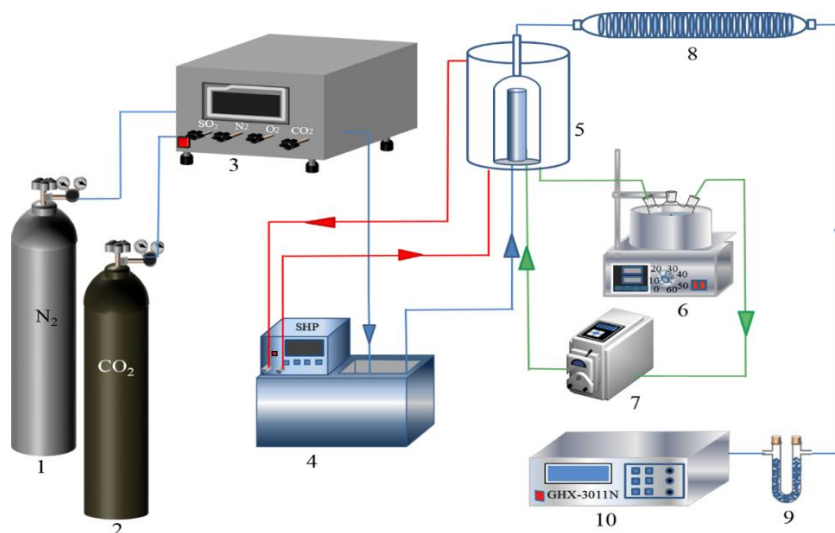

**Figure S1.** The wet-wall column experimental apparatus: 1. N<sub>2</sub> gas, 2. CO<sub>2</sub> gas, 3. gas distribution cabinet, 4. thermostat water bath (SHP), 5. WWC, 6. thermostat water bath magnetic stirrer, 7. peristaltic pump, 8. condensate tube, 9. drying tube, 10. infrared CO<sub>2</sub> analyzer (GHX-3011N).

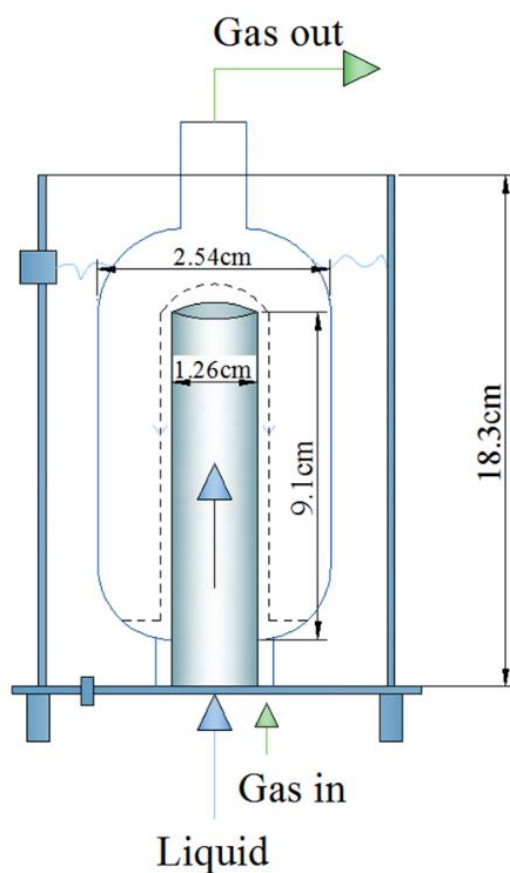

**Figure S2.** The detailed parameters of the wet-wall column

## Calculation on kinetics of CO<sub>2</sub> absorption

According to previous study<sup>1 2</sup>, the relationships among gas film mass transfer resistance ( $1/k_g$ ), liquid film mass transfer resistance ( $1/k_L$ ), and total mass transfer resistance ( $1/K_G$ ) were determined as follows:

$$\frac{1}{K_G} = \frac{1}{k_g} + \frac{1}{k_L} = \frac{1}{k_g} + \frac{H}{Ek_L^0} \quad (S1)$$

where  $k_g$ ,  $k_L$ , and  $K_G$  represent the gas film mass transfer coefficient, liquid film mass transfer coefficient, and total mass transfer coefficient, respectively ( $\text{mol}/\text{cm}^2 \cdot \text{s} \cdot \text{Pa}$ ); The total mass transfer resistance  $K_G$  was obtained through the slope of flux in relation to the logarithmic mean pressure, which is expressed described as follows:

$$K_G = \frac{Flux}{P_{CO_2} - P_{CO_2}^*} = \frac{dFlux}{dP_{CO_2}} \quad (S2)$$

$$Flux = \frac{(C_{CO_2,in} \% - C_{CO_2,out} \%) V_g}{22.4F} \quad (S3)$$

where  $P_{CO_2}^*$  is the equilibrium partial pressure of CO<sub>2</sub> (Pa);  $P_{CO_2}$  is the operating partial pressure of CO<sub>2</sub> in the WWC (Pa); and  $Flux$  is the gas absorption rate, which was estimated using Eq.(S3).  $F$  is the gas–liquid contact area of the WWC.  $P_{CO_2}$  was estimated using the logarithmic mean as follows:

$$P_{CO_2} = \frac{P_{CO_2,in} - P_{CO_2,out}}{\ln(P_{CO_2,in} / P_{CO_2,out})} \quad (S4)$$

The equilibrium partial pressure,  $P_{CO_2}^*$ , was calculated at  $Flux = 0$ . The gas film mass transfer coefficient ( $k_g$ ) in the WWC was estimated as follows<sup>3-8</sup>:

$$\frac{RTk_g h}{D_{CO_2}} = Sh = 1.075 \left( Re Sc \frac{d}{h} \right)^{0.85} \quad (S5)$$

where  $Sh$  is the Sherwood number,  $Re$  is the Reynolds number,  $Sc$  is the Schmidt

number,  $d$  is the hydraulic diameter (cm),  $h$  is the height of the WWC (cm), and  $D_{\text{CO}_2}$  is the diffusion coefficient ( $\text{cm}^2/\text{s}$ ).

### Regeneration Energy consumption estimation:

$$Q_{\text{reg}} = Q_{\text{rxn}} + Q_{\text{sens}} + Q_{\text{latent}} \quad (\text{S6})$$

$$Q_{\text{rxn}} = -m_{\text{am}} \int_{\text{lean}}^{\text{rich}} \Delta H_{\text{rxn}}(\alpha) d\alpha \quad (\text{S7})$$

$$Q_{\text{sens}} = m_{\text{am}} (c_{\text{am}} + r_w c_w + \alpha_{\text{lean}} c_{\text{CO}_2}) \Delta T \quad (\text{S8})$$

$$Q_{\text{latent}} = m_w \lambda \quad (\text{S9})$$

$$m_w = MP_w(T_{\text{top}}) / p_{\text{CO}_2}^*(T_{\text{top}}, \alpha_{\text{top}}) \quad (\text{S10})$$

In these equations,  $m_{\text{am}}$  is defined as the molar amount of amines in the circulating solvent per ton of  $\text{CO}_2$  product ( $\text{mol/t CO}_2$ );  $\Delta H_{\text{rxn}}$  is the reaction enthalpy ( $\text{kJ/mol}$ );  $\alpha$  and  $\alpha_{\text{lean}}$  represent the  $\text{CO}_2$  loading of the absorbent and lean solutions, respectively ( $\text{mol/mol}$ );  $c_{\text{am}}$ ,  $c_w$  and  $c_{\text{CO}_2}$  are the heat capacity of the amines, water, and  $\text{CO}_2$  per ton of  $\text{CO}_2$  product, respectively ( $\text{kJ}/(\text{mol} \cdot \text{K})$ );  $r_w$  is the molar ratio of water to amine in the fresh solvent;  $m_w$  is the molar amount of water vapor in the outlet gas steam per ton of  $\text{CO}_2$  product ( $\text{mol}$ );  $\lambda$  is the latent heat of water ( $\text{kJ/mol}$ );  $M$  is the molar amount per ton of  $\text{CO}_2$  ( $\text{mol}$ );  $P_w$  is the partial pressure of water vapor ( $\text{kPa}$ ); and  $P_{\text{CO}_2}^*$  is the partial pressure of  $\text{CO}_2$ .

The schematic for determining  $P_{\text{CO}_2}^*$  of the  $\text{CO}_2$ -loaded phase-splitting solvent is illustrated in Fig. S3. The total pressure ( $P_{\text{total}}$ ) was measured by a 50-ml high-pressure reactor at different  $\text{CO}_2$  loadings (0.25–0.48  $\text{mol/mol}$ ) and temperatures (110 and 120  $^\circ\text{C}$ ). The partial pressure of water vapor was calculated according to Raoult's law and  $P_{\text{CO}_2}^*$  was obtained by subtracting  $P_w$  from  $P_{\text{total}}$ . Accordingly,  $m_w$  was calculated

using Equation S10 and the corresponding  $Q_{\text{latent}}$  was obtained using Equation S9.

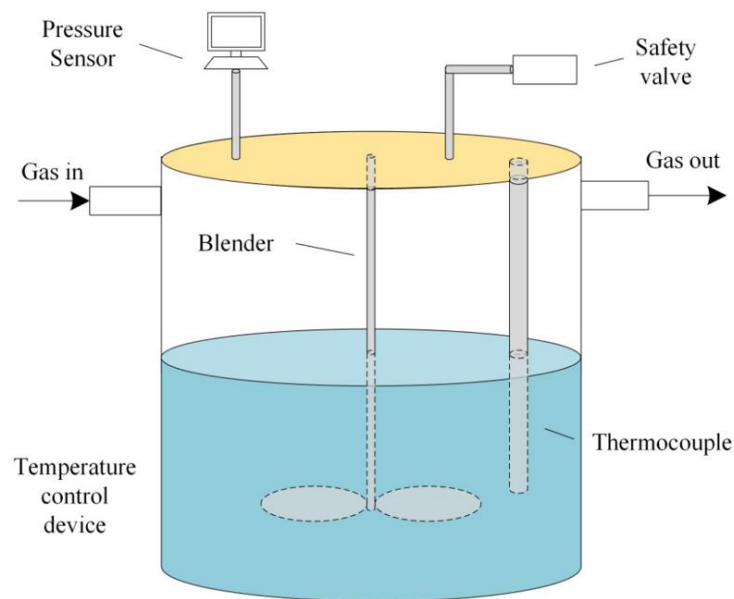

**Figure S3.** Apparatus for measuring the latent heat of CO<sub>2</sub> desorption

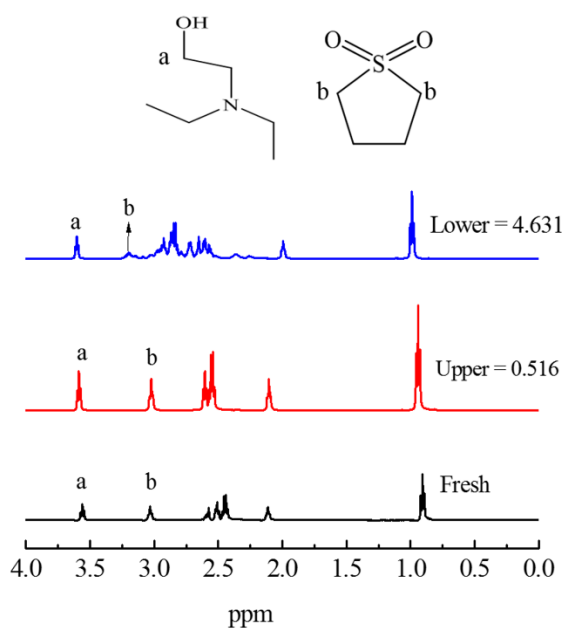

**Figure S4.** <sup>1</sup>H NMR spectra of DEEA-TETA-sulfolane: fresh, upper phase (CO<sub>2</sub> loading=0.516mol/L), lower phase (CO<sub>2</sub> loading=4.631mol/L).

**The calculation of concentration ratio  $C_{\text{sulfolane}}/C_{\text{DEEA}}$  from <sup>1</sup>H NMR spectra:**

$$C_{\text{sulfolane}} / C_{\text{DEEA}} = S_b / 2S_a \quad (\text{S11})$$

where  $S_a$  and  $S_b$  represent the integral areas of group a and group b, respectively.

**Table S1.** Quantitative species distribution in upper and lower phases

| Category    | Component | Loading (mol/l) | Volume (%) |
|-------------|-----------|-----------------|------------|
| Upper phase | DEEA      | 5.51            | 61         |
|             | sulfolane | 2.89            |            |
| Lower phase | DEEA      | 1.64            | 39         |
|             | TETA      | 2.56            |            |
|             | sulfolane | 0.61            |            |

**Table S2.** Kinetics of CO<sub>2</sub> absorption using TETA-DEEA-sulfolane absorbent in a wet-wall column

| Loading | $T$ | $V_g$  | $\mu$ | $\rho$ | $D_{CO_2}$           | $K_G$                           | $k_g$                           | $k_L$                           | $K_G/k_g$ | $K_G/k_L$ |
|---------|-----|--------|-------|--------|----------------------|---------------------------------|---------------------------------|---------------------------------|-----------|-----------|
| (mol/l) | (K) | (ml/s) | (cp)  | (g/ml) | (cm <sup>2</sup> /s) | (mol/cm <sup>2</sup> .<br>s.Pa) | (mol/cm <sup>2</sup> .<br>s.Pa) | (mol/cm <sup>2</sup> .<br>s.Pa) | (%)       | (%)       |
| 1.23    | 303 | 16.67  | 13.10 | 1.07   | 3.93E-06             | 1.88E-11                        | 1.21E-10                        | 2.23E-11                        | 15.58     | 84.42     |
| 1.23    | 318 | 16.67  | 7.98  | 1.07   | 5.67E-06             | 2.66E-11                        | 1.21E-10                        | 3.40E-11                        | 21.87     | 78.13     |
| 1.23    | 333 | 16.67  | 4.50  | 1.07   | 7.93E-06             | 3.15E-11                        | 1.22E-10                        | 4.24E-11                        | 25.80     | 74.20     |
| 1.23    | 348 | 16.67  | 3.37  | 1.07   | 1.09E-05             | 3.33E-11                        | 1.22E-10                        | 4.57E-11                        | 27.17     | 72.83     |
| 0.00    | 333 | 8.33   | 4.20  | 1.02   | 8.24E-06             | 6.21E-11                        | 6.80E-11                        | 7.05E-10                        | 91.20     | 8.80      |
| 0.00    | 333 | 16.67  | 4.20  | 1.02   | 8.24E-06             | 1.07E-10                        | 1.23E-10                        | 8.08E-10                        | 86.83     | 13.17     |
| 0.00    | 333 | 25.00  | 4.20  | 1.02   | 8.24E-06             | 1.45E-10                        | 1.73E-10                        | 9.08E-10                        | 83.98     | 16.02     |
| 0.00    | 333 | 33.33  | 4.20  | 1.02   | 8.24E-06             | 1.80E-10                        | 2.21E-10                        | 9.68E-10                        | 81.41     | 18.59     |
| 0.54    | 333 | 8.33   | 4.32  | 1.06   | 8.11E-06             | 4.54E-11                        | 6.80E-11                        | 1.37E-10                        | 66.87     | 33.13     |
| 0.54    | 333 | 16.67  | 4.32  | 1.06   | 8.11E-06             | 7.05E-11                        | 1.22E-10                        | 1.66E-10                        | 57.63     | 42.37     |
| 0.54    | 333 | 25.00  | 4.32  | 1.06   | 8.11E-06             | 8.62E-11                        | 1.73E-10                        | 1.72E-10                        | 49.93     | 50.07     |
| 0.54    | 333 | 33.33  | 4.32  | 1.06   | 8.11E-06             | 9.97E-11                        | 2.20E-10                        | 1.82E-10                        | 45.22     | 54.78     |
| 1.23    | 333 | 8.33   | 4.50  | 1.07   | 7.93E-06             | 2.11E-11                        | 6.77E-11                        | 3.06E-11                        | 31.15     | 68.85     |
| 1.23    | 333 | 16.67  | 4.50  | 1.07   | 7.93E-06             | 3.15E-11                        | 1.22E-10                        | 4.24E-11                        | 25.80     | 74.20     |
| 1.23    | 333 | 25.00  | 4.50  | 1.07   | 7.93E-06             | 3.47E-11                        | 1.72E-10                        | 4.35E-11                        | 20.16     | 79.84     |
| 1.23    | 333 | 33.33  | 4.50  | 1.07   | 7.93E-06             | 3.77E-11                        | 2.20E-10                        | 4.55E-11                        | 17.16     | 82.84     |

### The possible reactions during CO<sub>2</sub> absorption:

Dissociation of water:

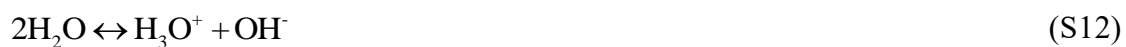

Dissociation of carbonic acid:

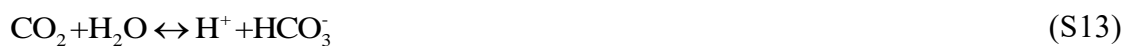

Dissociation of  $\text{HCO}_3^-$ :

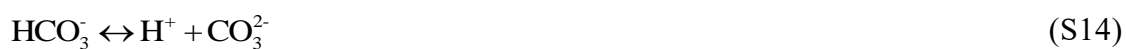

Dissociation of protonated TETA:

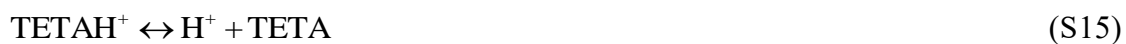

Dissociation of deprotonated TETA:

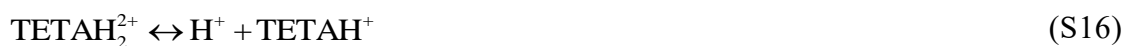

Dissociation of triprotonated TETA:

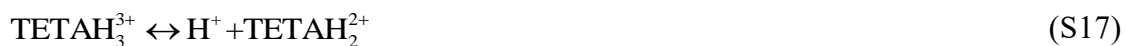

Dissociation of tetraprotonated TETA:

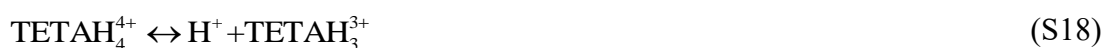

Formation of zwitterion:

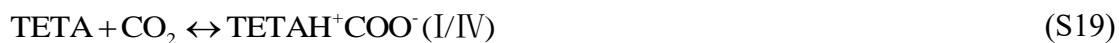

Formation of primary carbamate:

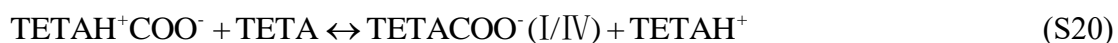

Formation of secondary carbamate:

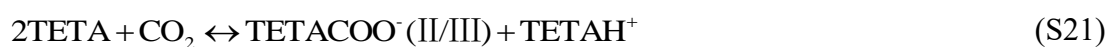

Formation of primary-primary dicarbamate:



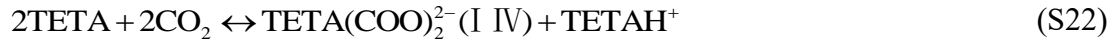

Formation of primary-secondary dicarbamate:

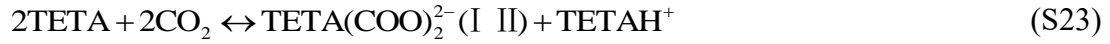

Formation of primary-secondary dicarbamate:

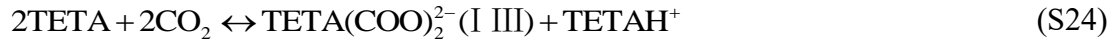

Formation of secondary-secondary dicarbamate:

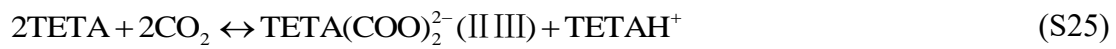

Formation of primary-secondary-secondary tricarbamate:

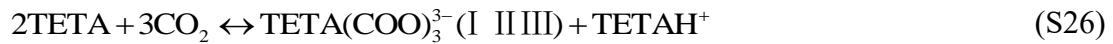

Formation of primary-secondary-primary tricarbamate:

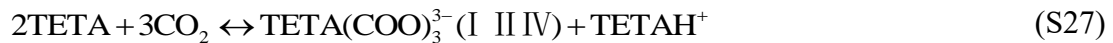

Formation of tetracarbamate:

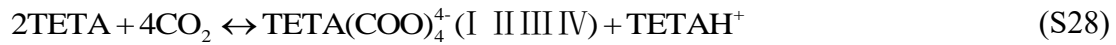

Dissociation of carbamate:

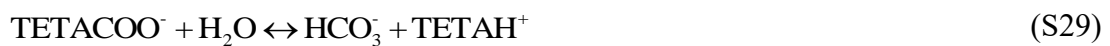

Formation of bicarbonate:

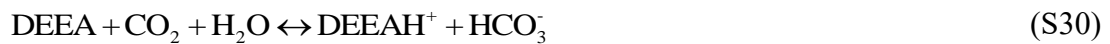

Dissociation of protonated DEEA:

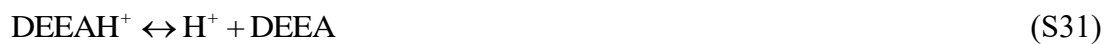

## References

1. Suda, T.; Iijima, M.; Tanaka, H.; Mitsuoka, S.; Iwaki, T., Countercurrent absorption of CO<sub>2</sub> in a real flue gas into aqueous alkanolamine solutions in a wetted wall column. *Environmental progress* **1997**, *16*,

(3), 200-207.

2. Dugas, R.; Rochelle, G., Absorption and desorption rates of carbon dioxide with monoethanolamine and piperazine. *Enrgy Proced* **2009**, *1*, (1), 1163-1169.
3. Chen, X., Carbon dioxide thermodynamics, kinetics, and mass transfer in aqueous piperazine derivatives and other amines. **2011**.
4. Pacheco, M. A.; Kaganoi, S.; Rochelle, G. T., CO<sub>2</sub> absorption into aqueous mixtures of diglycolamine® and methyldiethanolamine. *Chemical Engineering Science* **2000**, *55*, (21), 5125-5140.
5. Hobler, T.; Danckwerts, P. V., *Mass Transfer and Absorbers: International Series of Monographs in Chemical Engineering*. Elsevier Science: **2013**.
6. Sherwood, T., *Mass Transfer and Absorbers: International Series of Monographs in Chemical Engineering*. In Pergamon: **1967**.
7. Chen, S. M.; Hu, G. P.; Smith, K. H.; Mumford, K. A.; Zhang, Y. C.; Stevens, G. W., Kinetics of CO<sub>2</sub> Absorption in an Ethylethanolamine Based Solution. *Ind. Eng. Chem. Res.* **2017**, *56*, (43), 12305-12315.
8. Di, S.; Rochelle, G. T., Reaction kinetics of carbon dioxide and hydroxide in aqueous glycerol. *Chemical Engineering Science* **2017**, *161*, 151-158.
